# Supplementary material
Source: bioRxiv or medRxiv preprint supplement (https://medrxiv.org/highwire/filestream/95724/field_highwire_adjunct_files/2/2020.09.04.20188102-3.pdf)
Supplement: Supplementary file [file 2020.09.04.20188102-3.pdf]

**Supplementary Appendix Parameters by age only**

| CountryName              | hosp_rate   | hosp_rate_UB | hosp_rate_LB |
|--------------------------|-------------|--------------|--------------|
| Angola                   | 0.20575232  | 0.24180141   | 0.169683142  |
| Benin                    | 0.207539628 | 0.244104981  | 0.170945069  |
| Botswana                 | 0.209078609 | 0.246019337  | 0.17209894   |
| Burkina Faso             | 0.206022975 | 0.242120179  | 0.169903482  |
| Burundi                  | 0.205822653 | 0.241901247  | 0.169723863  |
| Cabo Verde               | 0.210261266 | 0.247813329  | 0.172671586  |
| Cameroon                 | 0.206608871 | 0.242891552  | 0.170301355  |
| Central African Republic | 0.206743817 | 0.243048818  | 0.170412838  |
| Congo (Brazzaville)      | 0.206606175 | 0.242928949  | 0.170259694  |
| Congo (Kinshasa)         | 0.207026747 | 0.243388486  | 0.170636906  |
| Cote d'Ivoire            | 0.206839964 | 0.243193023  | 0.170460991  |
| Djibouti                 | 0.209763985 | 0.246986986  | 0.172500846  |
| Egypt                    | 0.210968491 | 0.248536556  | 0.173354066  |
| Eritrea                  | 0.208725001 | 0.245625144  | 0.1717894    |
| Equatorial Guinea        | 0.206163714 | 0.242329163  | 0.169976012  |
| Eswatini                 | 0.20868778  | 0.245499907  | 0.171838277  |
| Ethiopia                 | 0.208066795 | 0.244836777  | 0.171266347  |
| Gambia                   | 0.206386242 | 0.242613311  | 0.170135712  |
| Ghana                    | 0.207187505 | 0.243633541  | 0.17071358   |
| Greece                   | 0.243184847 | 0.292094165  | 0.194120367  |
| Guinea                   | 0.206936577 | 0.243307671  | 0.170538807  |
| Guinea-Bissau            | 0.206697271 | 0.242966457  | 0.170401735  |
| Kenya                    | 0.205931114 | 0.242014768  | 0.169825994  |
| Liberia                  | 0.207544856 | 0.244114595  | 0.170945964  |
| Libya                    | 0.209669736 | 0.246937985  | 0.172363806  |
| Madagascar               | 0.207171292 | 0.243677881  | 0.170638676  |
| Malawi                   | 0.206432223 | 0.242646782  | 0.170193264  |
| Maldives                 | 0.208640744 | 0.245693829  | 0.171557465  |
| Mali                     | 0.20625116  | 0.242443117  | 0.170036536  |
| Mauritania               | 0.207348793 | 0.243860589  | 0.170808808  |
| Mauritius                | 0.221841386 | 0.262608797  | 0.180973756  |
| Morocco                  | 0.214135401 | 0.252667293  | 0.175542333  |
| Mozambique               | 0.206843839 | 0.243171506  | 0.170489514  |
| Namibia                  | 0.208227277 | 0.245006174  | 0.171416075  |
| Niger                    | 0.206347149 | 0.242538082  | 0.170132277  |
| Nigeria                  | 0.206589003 | 0.242839025  | 0.170313513  |
| Rwanda                   | 0.20698375  | 0.243382098  | 0.170558857  |
| Sao Tome and Principe    | 0.207038312 | 0.243492027  | 0.170558854  |
| Senegal                  | 0.207257688 | 0.243744438  | 0.170743248  |
| Seychelles               | 0.215189603 | 0.254053027  | 0.176260364  |
| Sierra Leone             | 0.207020638 | 0.243423407  | 0.170590965  |

|              |             |             |             |
|--------------|-------------|-------------|-------------|
| Somalia      | 0.206882422 | 0.243256952 | 0.170482012 |
| South Africa | 0.210965888 | 0.248452757 | 0.173430478 |
| South Sudan  | 0.20783077  | 0.244501808 | 0.171129631 |
| Sudan        | 0.208176285 | 0.244963113 | 0.171358029 |
| Syria        | 0.209918855 | 0.247289083 | 0.172510496 |
| Tanzania     | 0.206351373 | 0.242540083 | 0.170138607 |
| Togo         | 0.206822132 | 0.243151327 | 0.170466602 |
| Tunisia      | 0.216796979 | 0.256314451 | 0.177210668 |
| Uganda       | 0.205235195 | 0.241112756 | 0.16933958  |
| Zambia       | 0.205508643 | 0.241465189 | 0.169532648 |
| Zimbabwe     | 0.206943313 | 0.243307754 | 0.170551927 |
